# Supplementary material
Source: publisher figshare collection journal article supplement (https://springernature.figshare.com/ndownloader/files/17503619)
Supplement: Supplementary file [file 17503619]

## Additional file 1

### Types of documented drug prescriptions

Amongst the analysed drug prescriptions, drug initiation was the most commonly documented ( $n=433$ , 55.5%), followed by change in dose/time/formulation ( $n=229$ , 29.4%) and discontinuation ( $n=118$ ). The type of prescription did not predict the likelihood of documentation of prescribing rationale for psychotropic drugs ( $\chi^2=3.46$ ,  $p=0.178$ ). Analyses are summarised below.

**Table S1. Type of prescription for which the prescribing rationale was documented**

| Drug type         | Start    |        | Stop     |        | Dose/time/formulation change |        | $\chi^2$ (P)  |
|-------------------|----------|--------|----------|--------|------------------------------|--------|---------------|
|                   | <i>n</i> | (%)    | <i>n</i> | (%)    | <i>n</i>                     | (%)    |               |
| Non-psychotropics | 134      | (86.5) | 9        | (52.9) | 10                           | (66.7) | 11.00 (<0.05) |
| Psychotropics     | 155      | (55.8) | 46       | (45.5) | 108                          | (50.5) | 3.46 (0.178)  |
